# Supplementary material
Source: PubMed Central journal article supplement (PMC3428262)

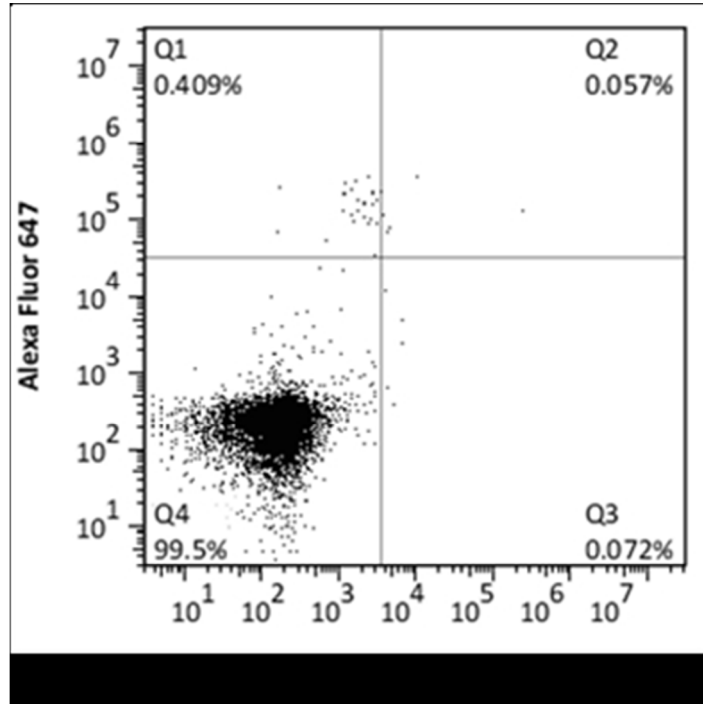

76x71mm (116 x 124 DPI)

Supplement: NIHMS387034-supplement-1_si_001.pdf [file NIHMS387034-supplement-1_si_001.pdf]
